# Supplementary material for: SNX16 activates c‐Myc signaling by inhibiting ubiquitin‐mediated proteasomal degradation of eEF1A2 in colorectal cancer development
Source: PubMed Central journal article supplement (PMC6998659; doi:10.1002/1878-0261.12626), 2020-01-10
Supplement: MOL2-14-387-s001.pdf [file MOL2-14-387-s001.pdf]

### SNX16

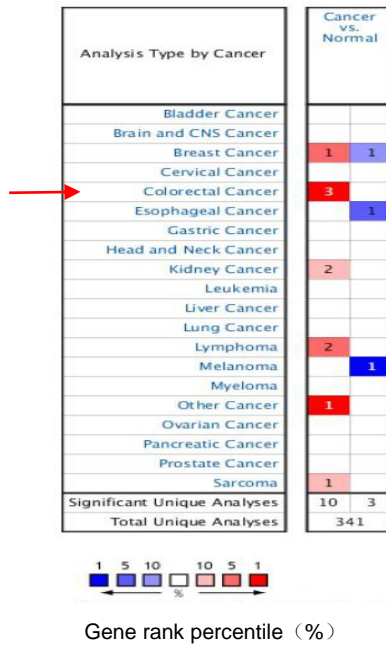

**Figure S1.** Expression of SNX16 in data from the Onconmine database. Analysis of SNX16 expression in various types of malignancies. Red indicates upregulation, and blue indicates downregulation.

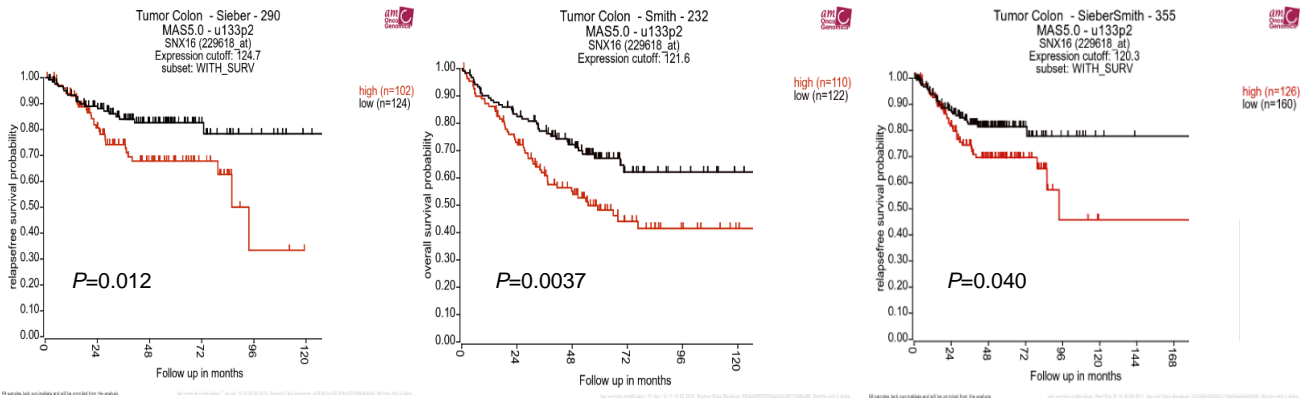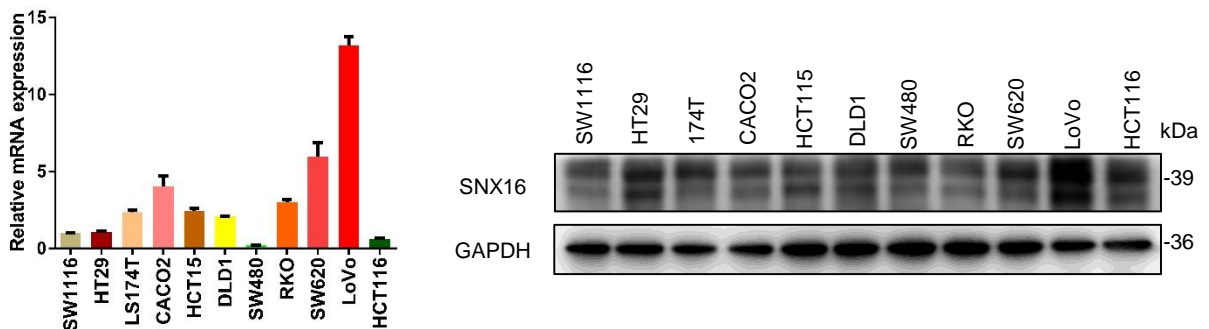

**Figure S3.** qRT-PCR and Western blot analyses of SNX16 expression in CRC cell lines.

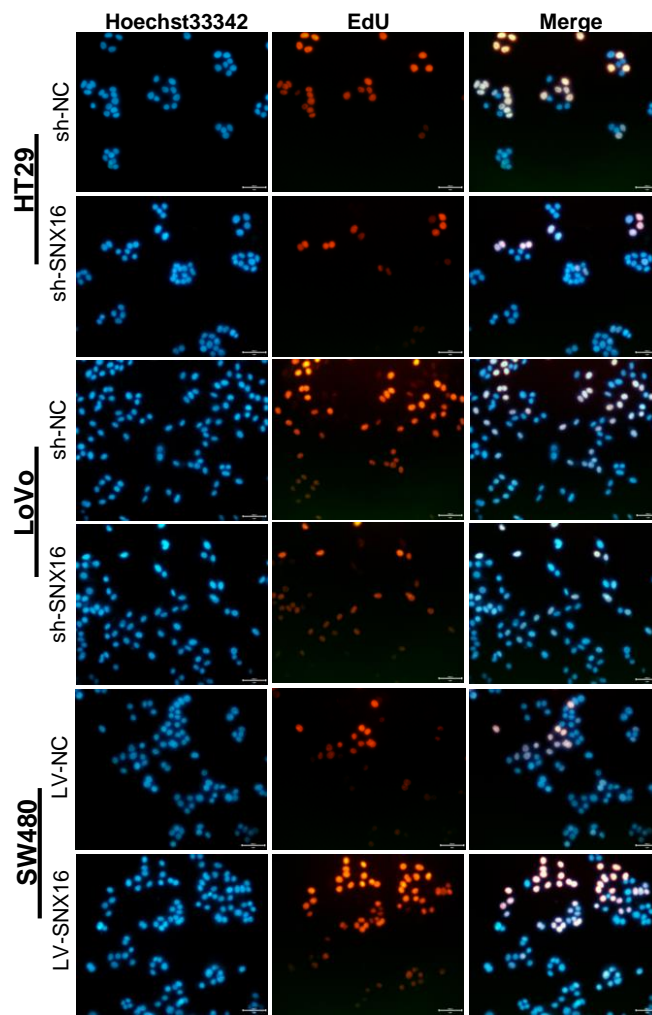

**Figure S4.** Images of EdU assays in indicated cell lines, related to Fig 2d. Scale bar, 50  $\mu$ m.

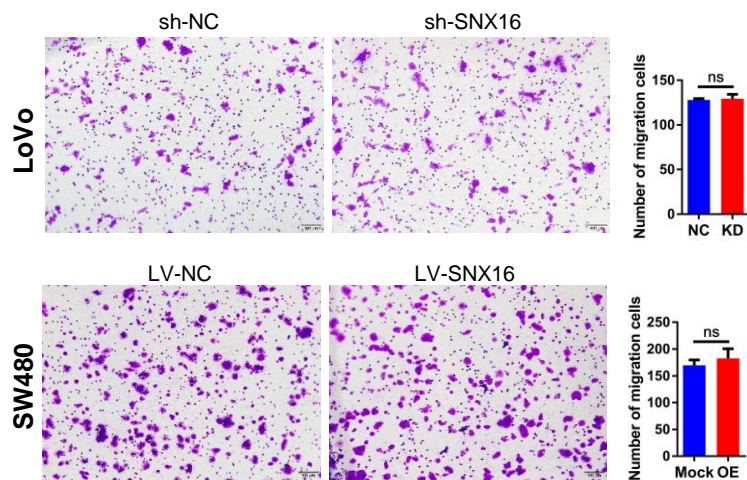

**Figure S5.** Knockdown or overexpression of SNX16 did not affect CRC cells migration. The results are shown as the means  $\pm$  SEMs (n=3); ns=non-significant ( $P>0.05$ ).

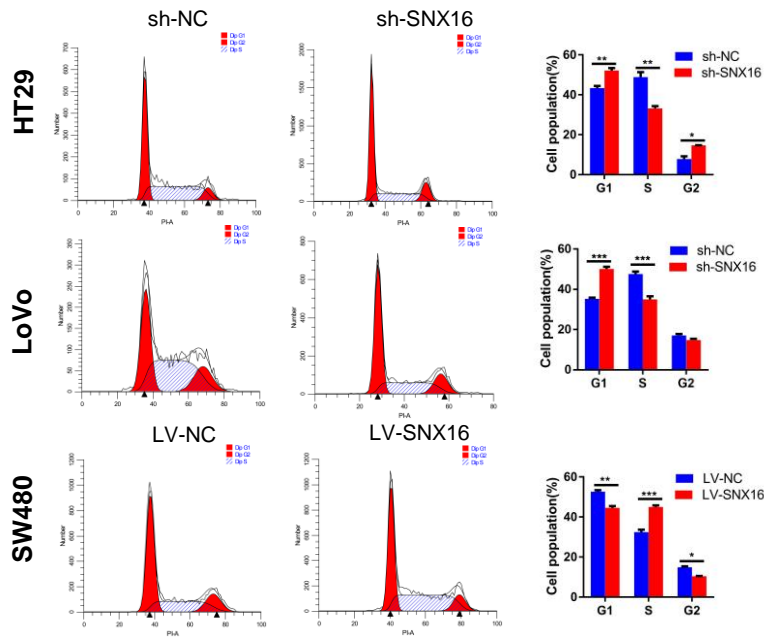

**Figure S6.** Cell cycle analysis. Cells were enriched in G1 phase by incubation with 0.8 mM L-aminosine for 20 hour. Cells were released and collected for flow cytometry analysis at the indicated time points. \* $P<0.05$ , \*\* $P<0.01$ , \*\*\* $P<0.001$ .

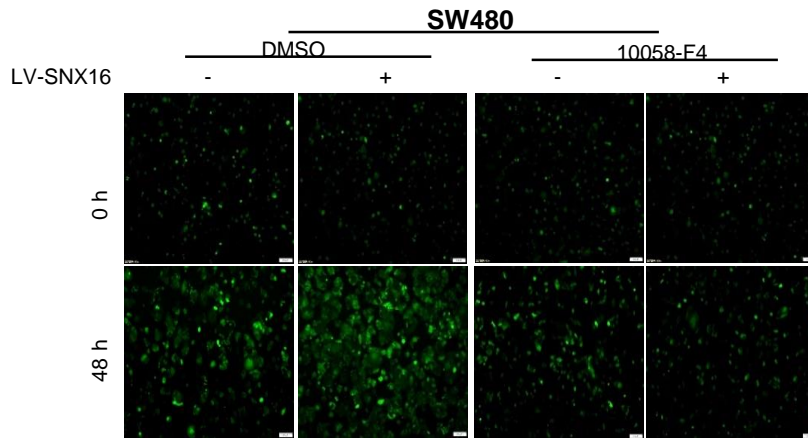

**Figure S7.** Cell survival assays were used to determine the vulnerability of cells (LV-NC vs. LV-SNX16) to 10058-F4 treatment. Scale bar, 100  $\mu\text{m}$ .

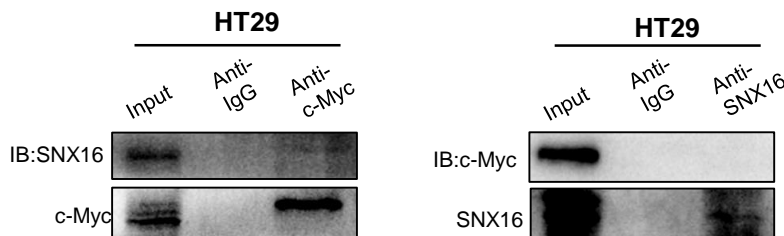

**Figure S8.** Co-IP was performed to detect the interaction between SNX16 and c-Myc in HT29 cells.

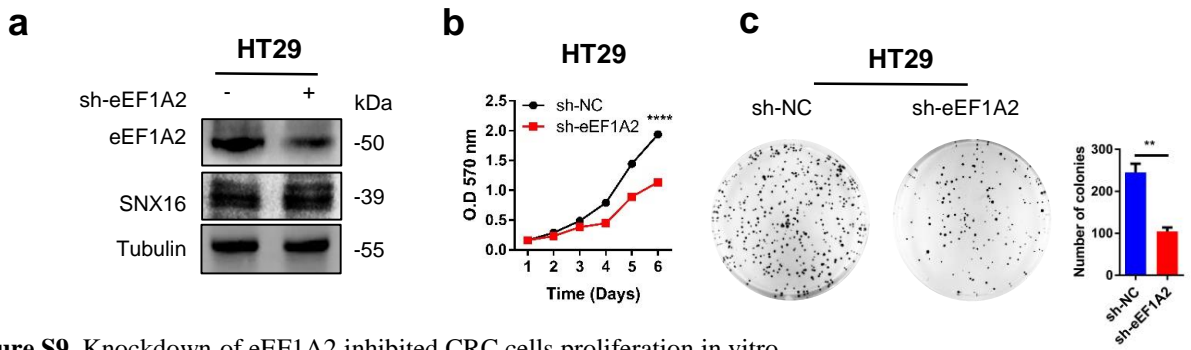

**Figure S9.** Knockdown of eEF1A2 inhibited CRC cells proliferation in vitro.

a. The expression of SNX16 and eEF1A2 in eEF1A2-knockdown cells were measured by Western blotting. Tubulin was used as the loading control.

b. MTT assay. The results are shown as the means  $\pm$  SEMs (n=5); \*\*\*\*P<0.0001.

c. Colony formation assays. The results are shown as the means  $\pm$  SEMs (n=3); \*\*P<0.01.
